# Supplementary material for: Der Übergabeprozess in der zentralen Notaufnahme – Konsentierung von Inhalten im Rahmen eines Delphi-Verfahrens
Source: Springer Nature journal article supplement (doi:10.1007/s10049-023-01130-3), 2023-03-15
Supplement: MOESM1 [file 24627226]

**Zusatzmaterial zum Beitrag** „Der Übergabeprozess in der Zentralen Notaufnahme – Konsentierung von Inhalten im Rahmen eines Delphi-Verfahrens“ von Gräff I, Pin M, Ehlers P et al. (2023) in *Notfall+Rechtsmedizin*

Beitrag und Zusatzmaterial stehen Ihnen auf [www.springermedizin.de](http://www.springermedizin.de) zur Verfügung. Bitte geben Sie dort den Beitragstitel in die Suche ein.

## Delphi-Verfahren Runde 1

| Nr. | Frage                                                                                                                                                                                                                                     | Ergebnis | Konsentierungsgrad             |
|-----|-------------------------------------------------------------------------------------------------------------------------------------------------------------------------------------------------------------------------------------------|----------|--------------------------------|
| 2   | Sind Sie der Meinung, dass es eine einheitliche Merkhilfe zur Übergabe an der Schnittstelle Rettungsdienst zur ZNA geben soll, die universell auf alle Erkrankungs- und Verletzungsentitäten von Notfallpatienten angewendet werden kann? | 98,1%    | Starker Konsens                |
| 3   | Sind Sie der Meinung, dass CRM-Aspekte als feste Bestandteile in einer Merkhilfe zur Übergabe verankert werden sollen? (z.B. Ruhe bei der Übergabe, keine Manipulation am Patienten, „face-to-face“ Kommunikation usw.)                   | 96,1%    | Starker Konsens                |
| 4   | Sind Sie der Meinung, dass Angaben zur Patientenidentifikation als feste Bestandteile in einer Merkhilfe zur Übergabe verankert werden sollen?                                                                                            | 98,0%    | Starker Konsens                |
| 5   | Welche(s) der folgenden Merkmale soll(en) während der Übergabe mitgeteilt werden, um eine ausreichende Identifikation des Patienten zu gewährleisten? Einfach- und Mehrfachauswahl möglich.                                               |          |                                |
|     | – Name                                                                                                                                                                                                                                    | 92,2%    | Konsens                        |
|     | – Geschlecht (Herr/Frau/Divers)                                                                                                                                                                                                           | 82,4%    | Konsens                        |
|     | – Alter                                                                                                                                                                                                                                   | 82,4%    | Konsens                        |
|     | – Vorname                                                                                                                                                                                                                                 | 45,1%    | Keine mehrheitliche Zustimmung |
|     | – Geburtsdatum                                                                                                                                                                                                                            | 21,6%    | Keine mehrheitliche Zustimmung |
|     | – Weitere/Andere Merkmale                                                                                                                                                                                                                 | 13,7%    | Keine mehrheitliche Zustimmung |
| 6   | Sind Sie der Meinung, dass Angaben zur Beschreibung der Notfallsituation als feste Bestandteile in einer Merkhilfe zur Übergabe verankert werden sollen?                                                                                  | 98,0%    | Starker Konsens                |
| 7   | Welche (s) der folgenden Merkmale soll(en) während der Übergabe mitgeteilt werden, um eine ausreichende Beschreibung der Notfallsituation zu gewährleisten? Einfach- und Mehrfachauswahl möglich.                                         |          |                                |
|     | – Leitsymptom/Verdachtsdiagnose (Was?)                                                                                                                                                                                                    | 98,0%    | Starker Konsens                |
|     | – Zeitpunkt/Onset (Wann?)                                                                                                                                                                                                                 | 94,1%    | Konsens                        |
|     | – Ursache/Auslöser (Wie?)                                                                                                                                                                                                                 | 88,2%    | Konsens                        |
|     | – Ort (Wo?)                                                                                                                                                                                                                               | 62,8%    | Mehrheitliche Zustimmung       |
|     | – Weitere/andere Merkmale                                                                                                                                                                                                                 | 23,5%    | Keine mehrheitliche Zustimmung |
| 8   | Sind Sie der Meinung, dass Angaben zu den Vitalparametern als feste Bestandteile in einer Merkhilfe zur Übergabe verankert werden sollen?                                                                                                 | 92,0%    | Starker Konsens                |
| 9   | Halten Sie die Erwähnung der Vitalparameter im Zusammenhang mit der Schilderung der Behandlungspriorität (z.B. mittels ABCDE-Schemas) während der Übergabe für sinnvoll?                                                                  | 94,0%    | Starker Konsens                |

|    |                                                                                                                                                                                                                  |       |                                |
|----|------------------------------------------------------------------------------------------------------------------------------------------------------------------------------------------------------------------|-------|--------------------------------|
| 10 | Unter welchen Umständen ist es Ihrer Meinung nach nötig, die Vitalparameter während der Übergabe mitzuteilen?                                                                                                    |       |                                |
|    | – Sobald eine Abweichung vom Normwert besteht, auch wenn diese nicht für das vorliegende Krankheitsbild relevant ist.                                                                                            | 36,0% | Keine mehrheitliche Zustimmung |
|    | – Immer, auch bei physiologischen Werten                                                                                                                                                                         | 32,0% | Keine mehrheitliche Zustimmung |
|    | – Wenn der/die Vitalparameter relevant für das vorliegende Krankheitsbild ist/sind                                                                                                                               | 26,0% | Keine mehrheitliche Zustimmung |
|    | – Keine der genannten Optionen                                                                                                                                                                                   | 6,0%  | Keine mehrheitliche Zustimmung |
|    | – Nie während der Übergabe                                                                                                                                                                                       | 0,0%  | Keine mehrheitliche Zustimmung |
| 11 | Welche/r der folgenden Vitalparameter/Scores sollte/n Ihrer Meinung nach, egal unter welchen Umständen, NIE während einer Übergabe erwähnt werden.                                                               |       |                                |
|    | – NACA-Score                                                                                                                                                                                                     | 64,0% | Mehrheitliche Zustimmung       |
|    | – Rekapillarierungszeit                                                                                                                                                                                          | 20,0% | Keine mehrheitliche Zustimmung |
|    | – Weitere/Andere                                                                                                                                                                                                 | 18,0% | Keine mehrheitliche Zustimmung |
|    | – Numerische-Rating-Skala (NRS)                                                                                                                                                                                  | 14,0% | Keine mehrheitliche Zustimmung |
|    | – Blutdruck (RR)                                                                                                                                                                                                 | 4,0%  | Keine mehrheitliche Zustimmung |
|    | – Periphere Sauerstoffsättigung (SpO2)                                                                                                                                                                           | 4,0%  | Keine mehrheitliche Zustimmung |
|    | – Herzfrequenz (HF)                                                                                                                                                                                              | 4,0%  | Keine mehrheitliche Zustimmung |
|    | – Kapnometrie/-graphie (CO2)                                                                                                                                                                                     | 4,0%  | Keine mehrheitliche Zustimmung |
|    | – Körpertemperatur (Temp)                                                                                                                                                                                        | 4,0%  | Keine mehrheitliche Zustimmung |
|    | – Glasgow-Coma-Scale (GCS)                                                                                                                                                                                       | 4,0%  | Keine mehrheitliche Zustimmung |
|    | – Atemfrequenz (AF)                                                                                                                                                                                              | 4,0%  | Keine mehrheitliche Zustimmung |
|    | – Blutzucker (BZ)                                                                                                                                                                                                | 2,0%  | Keine mehrheitliche Zustimmung |
|    |                                                                                                                                                                                                                  | 2,0%  | Keine mehrheitliche Zustimmung |
| 12 | Sind Sie der Meinung, dass Angaben zur Behandlungspriorität des vorliegenden medizinischen Problems in Form des ABCDE-Schemas als feste Bestandteile in einer Merkhilfe zur Übergabe verankert werden sollen?    | 89,8% | Konsens                        |
| 13 | In welcher Form sollen die Merkmale während der Übergabe mitgeteilt werden, um eine ausreichende Beschreibung einer vorliegenden/behandelten Pathologie des Atemweges zu gewährleisten?                          |       |                                |
|    | – Detaillierte Beschreibung des zugrunde liegenden "A-Problems" mit Nennung der Untersuchungsbefunde (z.B. vorliegendes "A-Problem" bei Kehlkopftrauma mit inspiratorischem Stridor und Schwellung der Atemwege) | 94,0% | Konsens                        |
|    | – Lediglich die Erwähnung eines vorliegenden "A-Problems" ist ausreichend (Keine Beschreibung der Untersuchungsbefunde)                                                                                          | 4,1%  | Keine mehrheitliche Zustimmung |
|    | – Keine der genannten Optionen                                                                                                                                                                                   | 2,0%  | Keine mehrheitliche Zustimmung |
|    | – Nur Beschreibung der Untersuchungsbefunde ohne Erwähnung von "A-Problem"                                                                                                                                       | 0,0%  | Keine mehrheitliche Zustimmung |

|    |                                                                                                                                                                                                                   |       |                                |
|----|-------------------------------------------------------------------------------------------------------------------------------------------------------------------------------------------------------------------|-------|--------------------------------|
| 14 | Soll bei einer vorliegenden/behandelten Pathologie der Atmung/Beatmung während der Übergabe von einem "B-Problem" gesprochen werden?                                                                              | 98%   | Starker Konsens                |
| 15 | Welche Merkmale sollen während der Übergabe mitgeteilt werden, um eine ausreichende Beschreibung einer vorliegenden/behandelten Pathologie der Atmung/Beatmung zu gewährleisten? Ein- und Mehrfachauswahl möglich |       |                                |
|    | – Entsprechende pathologische Untersuchungsbefunde (z.B. Atemnebengeräusche, Zyanose etc.)                                                                                                                        | 90,0% | Konsens                        |
|    | – Entsprechende pathologische Vitalparameter (z.B. SpO2, CO2, AF etc.)                                                                                                                                            | 85,7% | Konsens                        |
|    | – Entsprechende physiologische Untersuchungsbefunde (z.B. Vesikuläres Atemgeräusch etc.)                                                                                                                          | 30,6% | Keine mehrheitliche Zustimmung |
|    | – Entsprechende physiologische Vitalparameter (z.B. SpO2, CO2, AF etc.)                                                                                                                                           | 28,6% | Keine mehrheitliche Zustimmung |
|    | – Lediglich die Erwähnung eines vorliegenden "B-Problems" ist ausreichend (Keine Nennung von Vitalparametern und Untersuchungsbefunden)                                                                           | 6,1%  | Keine mehrheitliche Zustimmung |
|    | – Keine der genannten Optionen                                                                                                                                                                                    | 2,0%  | Keine mehrheitliche Zustimmung |
| 16 | Soll bei einer vorliegenden/behandelten Pathologie des Kreislaufs während der Übergabe von einem "C-Problem" gesprochen werden?                                                                                   | 98,0% | Starker Konsens                |
| 17 | Welche Merkmale sollen während der Übergabe mitgeteilt werden, um eine ausreichende Beschreibung einer vorliegenden/behandelten Pathologie des Kreislaufs zu gewährleisten? Ein- und Mehrfachauswahl möglich      |       |                                |
|    | – Entsprechende pathologische Untersuchungsbefunde (z.B. Atemnebengeräusche, Zyanose etc.)                                                                                                                        | 96,0% | Starker Konsens                |
|    | – Entsprechende pathologische Vitalparameter (z.B. RR, HF, EKG-Rhythmus etc.)                                                                                                                                     | 91,8% | Konsens                        |
|    | – Entsprechende physiologische Untersuchungsbefunde (z.B. gut tastbare periphere Pulse etc.)                                                                                                                      | 28,6% | Keine mehrheitliche Zustimmung |
|    | – Entsprechende physiologische Vitalparameter (z.B. RR, HF, EKG-Rhythmus etc.)                                                                                                                                    | 26,5% | Keine mehrheitliche Zustimmung |
|    | – Lediglich die Erwähnung eines vorliegenden "C-Problems" ist ausreichend (Keine Nennung von Vitalparametern und Untersuchungsbefunden)                                                                           | 0,0%  | Keine mehrheitliche Zustimmung |
|    | – Keine der genannten Optionen                                                                                                                                                                                    | 4,1%  | Keine mehrheitliche Zustimmung |
| 18 | Soll bei einer vorliegenden/behandelten Pathologie der Neurologie während der Übergabe von einem "D-Problem" gesprochen werden?                                                                                   | 98,0% | Starker Konsens                |
| 19 | Welche Merkmale sollen während der Übergabe mitgeteilt werden, um eine ausreichende Beschreibung einer vorliegenden/behandelten Pathologie der Neurologie zu gewährleisten? Ein- und Mehrfachauswahl möglich      |       |                                |

|    |                                                                                                                                                                                                                                                                                                                                                                                                                                                                                                                                                                                                                      |                                                                             |                                                                                                                                                                                                       |
|----|----------------------------------------------------------------------------------------------------------------------------------------------------------------------------------------------------------------------------------------------------------------------------------------------------------------------------------------------------------------------------------------------------------------------------------------------------------------------------------------------------------------------------------------------------------------------------------------------------------------------|-----------------------------------------------------------------------------|-------------------------------------------------------------------------------------------------------------------------------------------------------------------------------------------------------|
|    | <ul style="list-style-type: none"> <li>– Entsprechende pathologische Untersuchungsbefunde (z.B: Pupillendifferenz, gestörte pDMS etc.)</li> <li>– Entsprechende pathologische Vitalparameter/Scores (z.B. BZ, GCS etc.)</li> <li>– Entsprechende physiologische Vitalparameter/Scores (z.B. BZ, GCS etc.)</li> <li>– Entsprechende physiologische Untersuchungsbefunde (z.B. negatives Babinski-Zeichen etc.)</li> <li>– Lediglich Erwähnung eines vorliegenden "D-Problems" ist ausreichend (Keine Nennung von Vitalparametern/Scores und Untersuchungsbefunden)</li> <li>– Keine der genannten Optionen</li> </ul> | <p>98,0%</p> <p>96,0%</p> <p>28,6%</p> <p>22,5%</p> <p>0,0%</p> <p>2,0%</p> | <p>Starker Konsens</p> <p>Starker Konsens</p> <p>Keine mehrheitliche Zustimmung</p> <p>Keine mehrheitliche Zustimmung</p> <p>Keine mehrheitliche Zustimmung</p> <p>Keine mehrheitliche Zustimmung</p> |
| 20 | Soll bei einer vorliegenden/behandelten Pathologie in Bezug auf äußere Umstände/Hintergründe während der Übergabe von einem "E-Problem" gesprochen werden?                                                                                                                                                                                                                                                                                                                                                                                                                                                           | 98,0%                                                                       | Starker Konsens                                                                                                                                                                                       |
| 21 | Welche Merkmale sollen während der Übergabe mitgeteilt werden, um eine ausreichende Beschreibung eines vorliegenden/behandelten Problems des Patienten in Bezug auf äußere Umstände/Hintergründe zu gewährleisten? Ein- und Mehrfachauswahl möglich                                                                                                                                                                                                                                                                                                                                                                  |                                                                             |                                                                                                                                                                                                       |
|    | – Entsprechende pathologische Vitalparametern/Scores (z.B. Temperatur, NRS etc.)                                                                                                                                                                                                                                                                                                                                                                                                                                                                                                                                     | 91,8%                                                                       | Konsens                                                                                                                                                                                               |
|    | – Entsprechende pathologische Untersuchungsbefunde (z.B. OSG-Fraktur links etc.)                                                                                                                                                                                                                                                                                                                                                                                                                                                                                                                                     | 91,8%                                                                       | Konsens                                                                                                                                                                                               |
|    | – Entsprechende physiologische Untersuchungsbefunde (z.B. unauffälliger Bodycheck)                                                                                                                                                                                                                                                                                                                                                                                                                                                                                                                                   | 32,7%                                                                       | Keine mehrheitliche Zustimmung                                                                                                                                                                        |
|    | – Entsprechende physiologische Vitalparametern/Scores (z.B. Temperatur, NRS etc.)                                                                                                                                                                                                                                                                                                                                                                                                                                                                                                                                    | 26,5%                                                                       | Keine mehrheitliche Zustimmung                                                                                                                                                                        |
|    | – Lediglich die Erwähnung eines vorliegenden "E-Problems" ist ausreichend (Keine Nennung von Vitalparametern/Scores und Untersuchungsbefunden)                                                                                                                                                                                                                                                                                                                                                                                                                                                                       | 4,1%                                                                        | Keine mehrheitliche Zustimmung                                                                                                                                                                        |
|    | – Keine der genannten Optionen                                                                                                                                                                                                                                                                                                                                                                                                                                                                                                                                                                                       | 2,0%                                                                        | Keine mehrheitliche Zustimmung                                                                                                                                                                        |
| 22 | Sind Sie der Meinung, dass Angaben zu den präklinisch durchgeführten Maßnahmen als feste Bestandteile in einer Merkhilfe zur Übergabe verankert werden sollen?                                                                                                                                                                                                                                                                                                                                                                                                                                                       | 95,9%                                                                       | Starker Konsens                                                                                                                                                                                       |
| 23 | Welche(s) der folgenden Merkmale soll(en) während der Übergabe mitgeteilt werden, um eine ausreichende Beschreibung der durchgeführten präklinischen Maßnahmen zu gewährleisten? Einfach- und Mehrfachauswahl möglich                                                                                                                                                                                                                                                                                                                                                                                                |                                                                             |                                                                                                                                                                                                       |
|    | – Benennung der durchgeführten Maßnahme                                                                                                                                                                                                                                                                                                                                                                                                                                                                                                                                                                              | 89,8%                                                                       | Konsens                                                                                                                                                                                               |
|    | – Dosis/Umfang/Zeitpunkt der Maßnahme                                                                                                                                                                                                                                                                                                                                                                                                                                                                                                                                                                                | 81,6%                                                                       | Konsens                                                                                                                                                                                               |
|    | – Wirkung der Maßnahme auf den Patienten                                                                                                                                                                                                                                                                                                                                                                                                                                                                                                                                                                             | 75,5%                                                                       | Konsens                                                                                                                                                                                               |
|    | – Lokalisation der Maßnahme                                                                                                                                                                                                                                                                                                                                                                                                                                                                                                                                                                                          | 50,0%                                                                       | Mehrheitliche Zustimmung                                                                                                                                                                              |
|    | – Weitere/Andere Merkmale                                                                                                                                                                                                                                                                                                                                                                                                                                                                                                                                                                                            | 10,2%                                                                       | Keine mehrheitliche Zustimmung                                                                                                                                                                        |

|    |                                                                                                                                                                                                                                                                          |        |                                |
|----|--------------------------------------------------------------------------------------------------------------------------------------------------------------------------------------------------------------------------------------------------------------------------|--------|--------------------------------|
| 24 | Sind Sie der Meinung, dass Angaben zur Patientenanamnese als feste Bestandteile in einer Merkhilfe zur Übergabe verankert werden sollen?                                                                                                                                 | 98,0%  | Starker Konsens                |
| 25 | Welche(s) der folgenden Merkmale soll(en) während der Übergabe mitgeteilt werden, um ausreichende Informationen über die Anamnese des Patienten bereitzustellen? (Die Einschätzung der Relevanz obliegt dem Rettungsdienstpersonal) Einfach- und Mehrfachauswahl möglich |        |                                |
|    | – Allergien des Patienten                                                                                                                                                                                                                                                | 100,0% | Starker Konsens                |
|    | – Angaben zum Infektions-Status des Patienten                                                                                                                                                                                                                            | 95,9%  | Starker Konsens                |
|    | – Relevante Vorerkrankungen des Patienten                                                                                                                                                                                                                                | 89,8%  | Konsens                        |
|    | – Soziale/Organisatorische Aspekte                                                                                                                                                                                                                                       | 85,7%  | Konsens                        |
|    | – Aktuelle Medikation des Patienten                                                                                                                                                                                                                                      | 77,6%  | Konsens                        |
|    | – Risikofaktoren, die in Zusammenhang mit der Erkrankung stehen                                                                                                                                                                                                          | 53,1%  | Mehrheitliche Zustimmung       |
|    | – Angaben zur letzten Nahrungs- bzw. Flüssigkeitsaufnahme des Patienten                                                                                                                                                                                                  | 44,9%  | Keine mehrheitliche Zustimmung |
| 26 | – Weitere/Andere Merkmale                                                                                                                                                                                                                                                | 20,4%  | Keine mehrheitliche Zustimmung |
|    | Wie soll vorgegangen werden, wenn eine leere bzw. negative Anamnese des Patienten vorliegt? (z.B. keine Allergien vorhanden sind)                                                                                                                                        |        |                                |
|    | – Es soll erwähnt werden, dass der Patient keine Allergien aufweist                                                                                                                                                                                                      | 75,5%  | Konsens                        |
| 27 | – Dieser Punkt wird während der Übergabe nicht erwähnt. Angaben zur Abwesenheit der Allergien werden nicht gemacht.                                                                                                                                                      | 24,5%  | Keine mehrheitliche Zustimmung |
|    | Wie soll vorgegangen werden, wenn die Anamnese des Patienten positiv ausfällt, aber keine Bedeutung für die unmittelbare/lebensrettende Versorgung des Patienten hat? (z.B. Nahrungsmittelallergie bei Trauma)                                                           |        |                                |
|    | – Es soll ein Verweis erfolgen, dass die Informationen in schriftlicher Form (z.B. RD-Protokoll) vorliegen                                                                                                                                                               | 49,0%  | Keine mehrheitliche Zustimmung |
|    | – Die Allergie soll trotzdem erwähnt werden                                                                                                                                                                                                                              | 38,8%  | Keine mehrheitliche Zustimmung |
| 28 | – Es soll keine Auskunft zur Allergie erfolgen                                                                                                                                                                                                                           | 12,2%  | Keine mehrheitliche Zustimmung |
|    | In welcher Reihenfolge sollen ihrer Meinung nach die zuvor benannten Kerninhalte während der Übergabe erwähnt werden? Die Items lassen sich mit Hilfe der Pfeile bzw. mittels "Drag and Drop" sortieren.                                                                 |        |                                |
|    | 1. Patientenidentifikation                                                                                                                                                                                                                                               | 95,9%  | Starker Konsens                |
|    | 2. Beschreibung des Notfallereignisses                                                                                                                                                                                                                                   | 79,6%  | Konsens                        |
|    | 3. Behandlungspriorität                                                                                                                                                                                                                                                  | 55,1%  | Mehrheitliche Zustimmung       |
| 29 | 4. Durchgeführte Maßnahme                                                                                                                                                                                                                                                | 51,0%  | Mehrheitliche Zustimmung       |
|    | 5. Patientenanamnese                                                                                                                                                                                                                                                     | 53,1%  | Mehrheitliche Zustimmung       |
| 30 | Sind Sie der Meinung, dass die Kerninhalte am Ende der Übergabe durch das aufnehmende Personal (z.B. Teamleader, Pflegekraft) wiederholt werden sollen?                                                                                                                  | 98,0%  | Starker Konsens                |
| 31 | Sind Sie der Meinung, dass der Aspekt "Wiederholung von Kerninhalten" als fester Bestandteil in einer Merkhilfe zur Übergabe verankert werden soll?                                                                                                                      | 93,9%  | Starker Konsens                |
| 32 | Welche Information(en) soll(en) Ihrer Meinung nach bei der abschließenden Wiederholung der Übergabeinhalte vom aufnehmenden Personal genannt werden? Einfach- und Mehrfachauswahl möglich                                                                                |        |                                |

|    |                                                                                                                                                                                                                                                                                                                                                    |                                                                      |                                                                                                                                                                                                           |
|----|----------------------------------------------------------------------------------------------------------------------------------------------------------------------------------------------------------------------------------------------------------------------------------------------------------------------------------------------------|----------------------------------------------------------------------|-----------------------------------------------------------------------------------------------------------------------------------------------------------------------------------------------------------|
|    | <ul style="list-style-type: none"> <li>– Prioritätenbeschreibung (ABCDE-Schema)</li> <li>– Ereignisbeschreibung</li> <li>– Durchgeführte Maßnahmen</li> <li>– Informationen zur Patientenidentifikation</li> <li>– Wirkung der Maßnahmen</li> <li>– Vitalparameter</li> <li>– Patientenanamnese</li> <li>– Weitere/Andere Informationen</li> </ul> | 95,9%<br>83,7%<br>75,5%<br>53,1%<br>40,8%<br>26,5%<br>24,5%<br>14,3% | Starker Konsens<br>Konsens<br>Konsens<br>Mehrheitliche Zustimmung<br>Keine mehrheitliche Zustimmung<br>Keine mehrheitliche Zustimmung<br>Keine mehrheitliche Zustimmung<br>Keine mehrheitliche Zustimmung |
| 32 | Sind Sie der Meinung, dass am Ende der Übergabe Fragen aus dem aufnehmenden Team zugelassen werden sollen?                                                                                                                                                                                                                                         | 100,0%                                                               | Starker Konsens                                                                                                                                                                                           |
| 33 | Sind Sie der Meinung, dass der Aspekt "Fragen aus dem aufnehmenden Team" als fester Bestandteil in einer Merkhilfe zur Übergabe verankert werden soll?                                                                                                                                                                                             | 83,3%                                                                | Konsens                                                                                                                                                                                                   |
| 34 | Wie soll Ihrer Meinung nach der Sachverhalt kommuniziert werden, wenn Informationen nicht vorhanden sind bzw. nicht ermittelt werden können? (z.B. das Alter des Patienten)                                                                                                                                                                        |                                                                      |                                                                                                                                                                                                           |
|    | <ul style="list-style-type: none"> <li>– Es soll erwähnt werden, dass zu diesem Punkt keine Informationen vorliegen (z.B. "Herr/Frau xy unbekannten Alters")</li> <li>– Der entsprechende Punkt soll während der Übergabe ignoriert und nicht erwähnt werden</li> </ul>                                                                            | 97,9%<br><br>2,1%                                                    | Starker Konsens<br><br>Keine mehrheitliche Zustimmung                                                                                                                                                     |

## Delphi-Verfahren Runde 2

|   |                                                                                                                                                                                                                            |                         |                                                                                              |
|---|----------------------------------------------------------------------------------------------------------------------------------------------------------------------------------------------------------------------------|-------------------------|----------------------------------------------------------------------------------------------|
| 2 | Welche(s) der folgenden Merkmale soll(en), neben den bereits konsentierten Merkmalen, während der Übergabe mitgeteilt werden, um eine ausreichende Identifikation des Patienten zu gewährleisten?                          |                         |                                                                                              |
|   | <ul style="list-style-type: none"> <li>– Konsens aus Runde 1 ist ausreichend, keine weiteren Merkmale/Änderungen gewünscht</li> <li>– Vorname</li> <li>– Geburtsdatum (dd/mm/jjjj)</li> </ul>                              | 76,2%<br>16,7%<br>9,5%  | Konsens<br>Keine mehrheitliche Zustimmung<br>Keine mehrheitliche Zustimmung                  |
| 3 | Q3. Welche (s) der folgenden Merkmale soll(en), neben den bereits konsentierten Merkmalen, während der Übergabe mitgeteilt werden, um eine ausreichende Beschreibung der Notfallsituation zu gewährleisten?                |                         |                                                                                              |
|   | <ul style="list-style-type: none"> <li>– Ort/Auffindesituation (Wo?/Woher?)</li> <li>– Besondere (Begleit-)Umstände</li> <li>– Konsens aus Runde 1 ist ausreichend</li> </ul>                                              | 69,1%<br>45,2%<br>26,2% | Mehrheitliche Zustimmung<br>Keine mehrheitliche Zustimmung<br>Keine mehrheitliche Zustimmung |
| 4 | Sind Sie der Meinung, dass im Kontext eines A-, B-, C-, D-, E-Problems zusätzlich zu den pathologischen Vitalparametern/Scores (bereits konsentiert) auch die physiologischen Vitalparameter/Scores erwähnt werden sollen? |                         |                                                                                              |
|   | <ul style="list-style-type: none"> <li>– Nein, die Nennung von pathologischen Vitalparametern/Scores ist ausreichend</li> <li>– Ja, es sollen zusätzlich physiologische Vitalparameter/Scores erwähnt werden</li> </ul>    | 76,2%<br>23,2%          | Konsens<br>Keine mehrheitliche Zustimmung                                                    |

|    |                                                                                                                                                                                                                                                                          |                |                                                   |
|----|--------------------------------------------------------------------------------------------------------------------------------------------------------------------------------------------------------------------------------------------------------------------------|----------------|---------------------------------------------------|
| 5  | Sind Sie der Meinung, dass von der Norm abweichende Vitalparameter während der Übergabe übermittelt werden sollen, auch wenn diese nicht in direktem Zusammenhang mit einem ABCDE-Problem stehen? (z.B. gemessene Temperatur von 39,0°C bei primärem Suppinationstrauma) |                |                                                   |
|    | <ul style="list-style-type: none"> <li>– Ja</li> <li>– Nein</li> </ul>                                                                                                                                                                                                   | 97,6%<br>2,4%  | Starker Konsens<br>Keine mehrheitliche Zustimmung |
| 6  | Sind Sie der Meinung, dass bei Patienten ohne ABCDE-Problem und physiologischen Vitalparametern/Scores, diese mit dem Wortlaut "unauffällige Vitalparameter" zusammengefasst werden können?                                                                              |                |                                                   |
|    | <ul style="list-style-type: none"> <li>– Ja, eine Zusammenfassung ist ausreichend</li> <li>– Nein, jeder physiologische Vitalparameter/Score sollte einzeln als Wert genannt werden</li> </ul>                                                                           | 95,2%<br>4,8%  | Starker Konsens<br>Keine mehrheitliche Zustimmung |
| 7  | Halten Sie die Anwendung des NACA-Scores während der Übergabe für sinnvoll?                                                                                                                                                                                              |                |                                                   |
|    | <ul style="list-style-type: none"> <li>– Nein</li> <li>– Ja</li> </ul>                                                                                                                                                                                                   | 90,5%<br>9,5%  | Konsens<br>Keine mehrheitliche Zustimmung         |
| 8  | Welche(s) der folgenden Merkmale soll(en), neben den bereits konsentierten Merkmalen, während der Übergabe mitgeteilt werden, um eine ausreichende Beschreibung der durchgeführten präklinischen Maßnahmen zu gewährleisten?                                             |                |                                                   |
|    | <ul style="list-style-type: none"> <li>– Bewusst unterlassene Maßnahmen</li> <li>– Konsens aus Runde 1 ist ausreichend</li> </ul>                                                                                                                                        | 85,7%<br>14,3% | Konsens<br>Keine mehrheitliche Zustimmung         |
| 9  | Welche(s) der folgenden Merkmale soll(en), neben den bereits konsentierten Merkmalen, während der Übergabe mitgeteilt werden, um ausreichende Informationen über die Anamnese des Patienten bereitzustellen?                                                             |                |                                                   |
|    | – Weitere Besonderheiten (z.B. DNR, DNI.)                                                                                                                                                                                                                                | 76,2%          | Konsens                                           |
|    | – Risikofaktoren, die in Zusammenhang mit der Erkrankung stehen                                                                                                                                                                                                          | 19,1%          | Keine mehrheitliche Zustimmung                    |
|    | – Angaben zur letzten Nahrungs- bzw. Flüssigkeitsaufnahme des Patienten                                                                                                                                                                                                  | 14,3%          | Keine mehrheitliche Zustimmung                    |
|    | – Frailty-Status bei älteren und alten Patienten                                                                                                                                                                                                                         | 14,3%          | Keine mehrheitliche Zustimmung                    |
|    | – Konsens aus Runde 1 ist ausreichend                                                                                                                                                                                                                                    | 23,8%          | Keine mehrheitliche Zustimmung                    |
| 10 | Wie soll vorgegangen werden, wenn die Anamnese des Patienten positiv ausfällt, aber keine Bedeutung für die unmittelbare/lebensrettende Versorgung des Patienten hat? (z.B. Nahrungsmittelallergie bei Trauma)                                                           |                |                                                   |
|    | – Ein mündlicher Verweis auf die schriftliche Fixierung im RD-/NA-Protokoll während der Übergabe ist ausreichend                                                                                                                                                         | 54,8%          | Mehrheitliche Zustimmung                          |
|    | – Die Allergie soll trotzdem erwähnt werden                                                                                                                                                                                                                              | 38,1%          | Keine mehrheitliche Zustimmung                    |
|    | – Es soll keine Auskunft zur Allergie erfolgen                                                                                                                                                                                                                           | 7,1%           | Keine mehrheitliche Zustimmung                    |
| 11 | In welcher Reihenfolge sollen ihrer Meinung nach die folgenden Kerninhalte im Anschluss an die Patientenidentifikation (bereits konsentiert) und die Beschreibung des Notfallereignisses (bereits konsentiert) erwähnt werden?                                           |                |                                                   |
|    | – 1. Behandlungspriorität                                                                                                                                                                                                                                                | 59,5%          | Mehrheitliche Zustimmung                          |
|    | – 2. Patientenanamnese                                                                                                                                                                                                                                                   | 47,6%          | Keine mehrheitliche Zustimmung                    |
|    | – 3. Durchgeführte Maßnahmen                                                                                                                                                                                                                                             | 71,4%          | Mehrheitliche Zustimmung                          |

|    |                                                                                                                                                                                                 |       |                                |
|----|-------------------------------------------------------------------------------------------------------------------------------------------------------------------------------------------------|-------|--------------------------------|
| 12 | Welche Information(en) soll(en), neben den bereits Konsentierten Inhalten, Ihrer Meinung nach bei der abschließenden Wiederholung der Übergabeinhalte vom aufnehmenden Personal genannt werden? |       |                                |
|    | – Weiter bestehende/neu aufgetretene Probleme                                                                                                                                                   | 45,2% | Keine mehrheitliche Zustimmung |
|    | – Konsens aus Runde 1 ist ausreichend, keine weiteren Merkmale/Änderungen gewünscht                                                                                                             | 40,5% | Keine mehrheitliche Zustimmung |
|    | – Wirkung der Maßnahmen                                                                                                                                                                         | 26,2% | Keine mehrheitliche Zustimmung |
|    | – Informationen zur Patientenidentifikation                                                                                                                                                     | 23,8% | Keine mehrheitliche Zustimmung |
|    | – Patientenanamnese                                                                                                                                                                             | 19,1% | Keine mehrheitliche Zustimmung |
| 13 | – Vitalparameter                                                                                                                                                                                | 16,7% | Keine mehrheitliche Zustimmung |
|    | Sind Sie der Meinung, dass eine vollständige Übergabe eines komplexen Patienten maximal zwischen 90-120 Sekunden in Anspruch nehmen sollte? Mittelwert aus Runde 108 Sekunden                   |       |                                |
|    | – Ja                                                                                                                                                                                            | 85,7% | Konsens                        |
|    | – Nein                                                                                                                                                                                          | 14,3% | Keine mehrheitliche Zustimmung |
